# Supplementary material for: Cell type specific transcriptomic differences in depression show similar patterns between males and females but implicate distinct cell types and genes
Source: PubMed Central journal article supplement (PMC10203145; doi:10.1038/s41467-023-38530-5), 2023-05-22
Supplement: 41467_2023_38530_MOESM1_ESM.pdf [file 41467_2023_38530_MOESM1_ESM.pdf]

## Supplementary Information

### Supplementary Figures

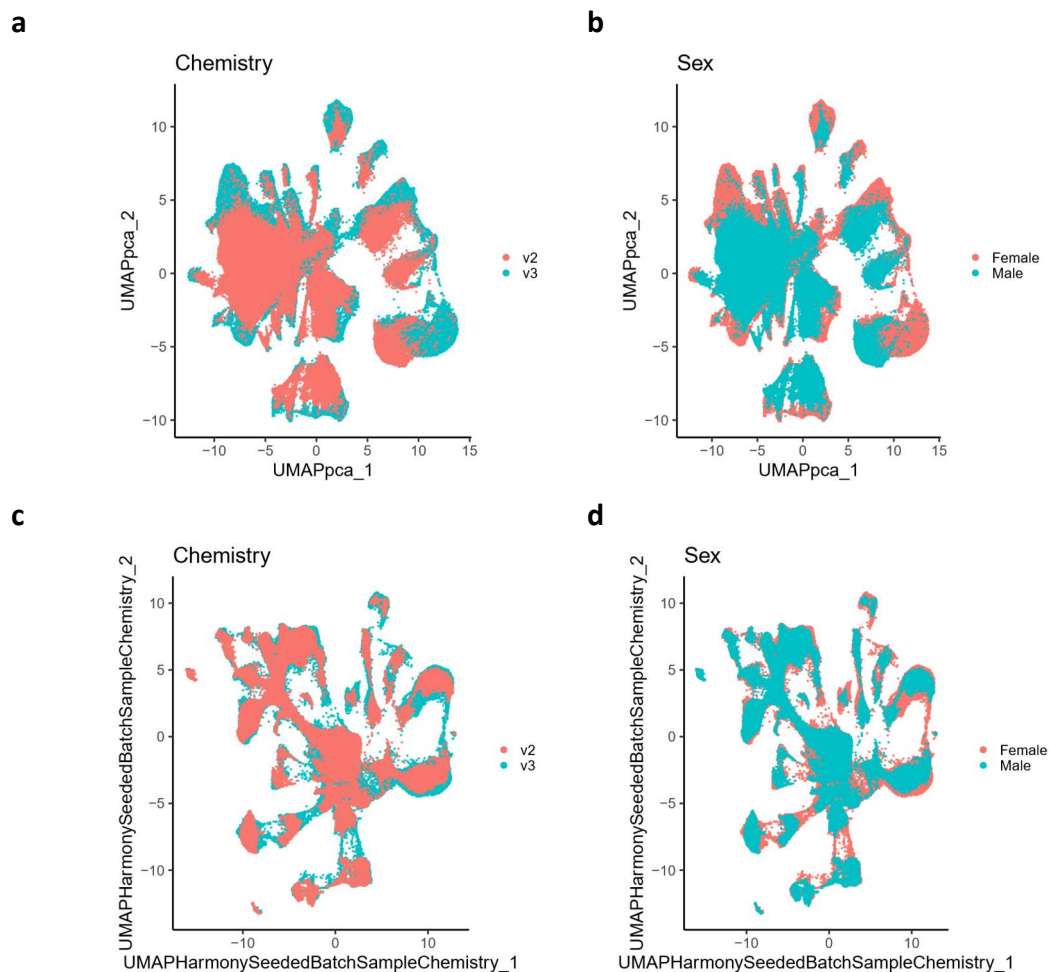

**Supplementary Figure 1: UMAP plots using uncorrected and Harmony corrected PCA components.** a-b) UMAP plot using uncorrected PCA components colored by chemistry and sex. c-d) UMAP plot using Harmony corrected PCA components colored by chemistry and sex. For UMAPs we used all 100 PC components or Harmony corrected PC components with other parameters set to default. Source data are provided as a Source Data file.

a

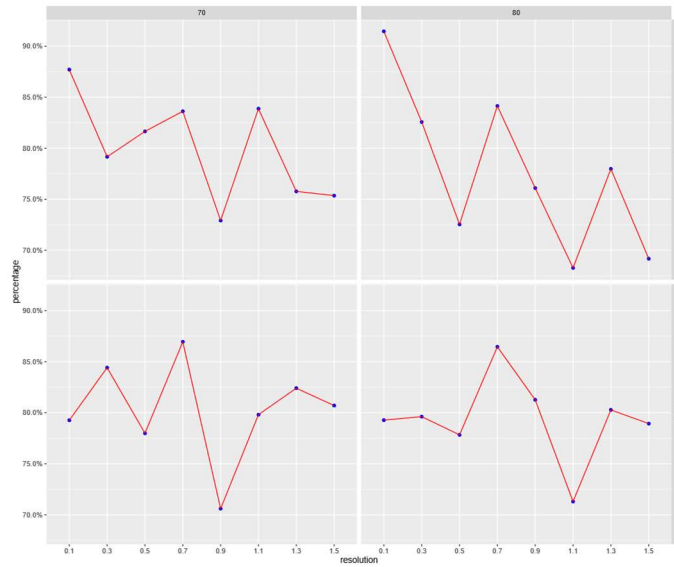

b

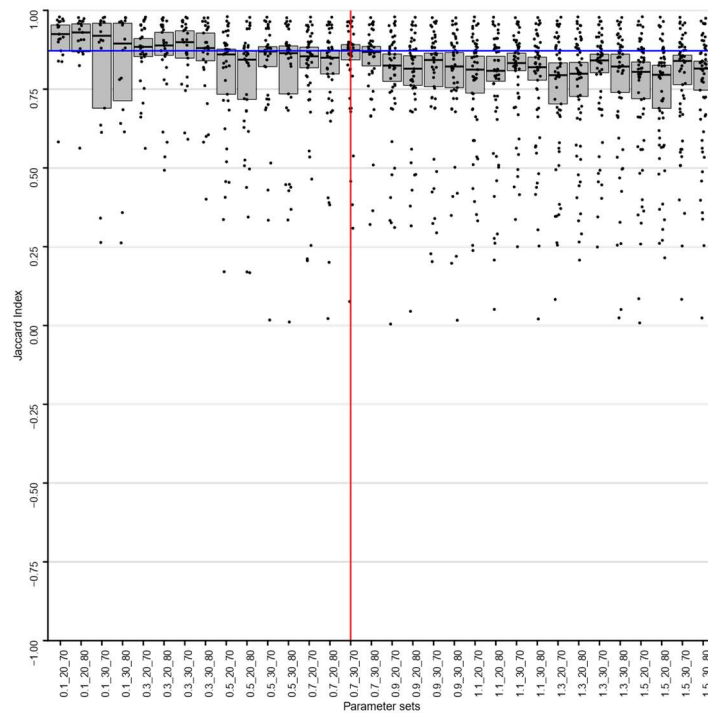

**Supplementary Figure 2: Assessment of clustering parameters.** a) scclusteval output showing the percentage of nuclei in stable clusters, as assessed by sub-sampling and Jaccard index calculation, using a range of clustering parameters. b) Boxplots showing the median Jaccard index for each cluster across sub-sampling with different parameter combinations for clustering. The

individual dots correspond to the median Jaccard index, across all sub-samplings, for each cluster obtained using the given set of parameters. The boxes represent the bootstrapped 95% confidence interval for the median of the median Jaccard index across all clusters, for the given set of clustering parameters. The box starts at the lower bound of the confidence interval and extends to the higher bound, while the line in the center represents the actual median. The clustering parameters that provide the highest number of clusters, while crossing a bootstrapped threshold of median Jaccard index across clusters, are highlighted. Source data are provided as a Source Data file.

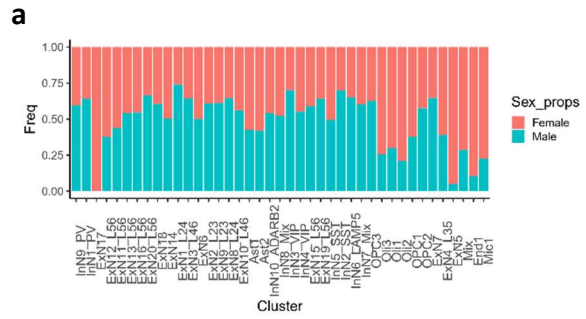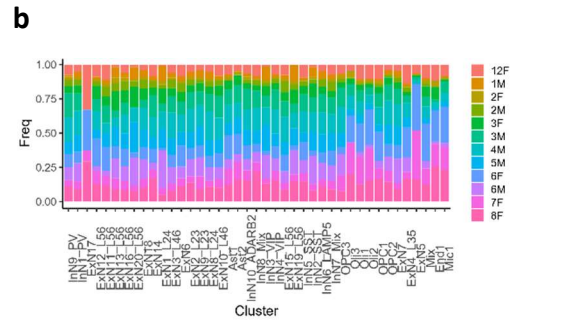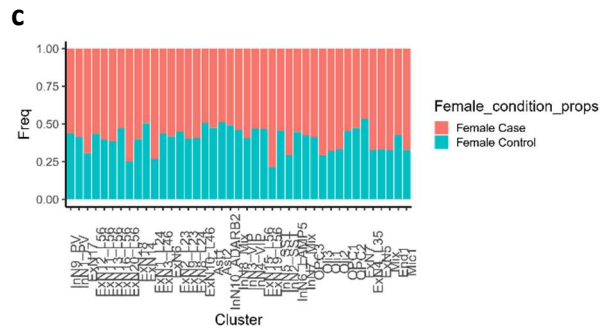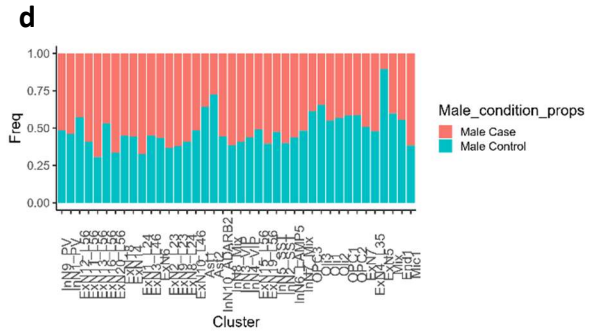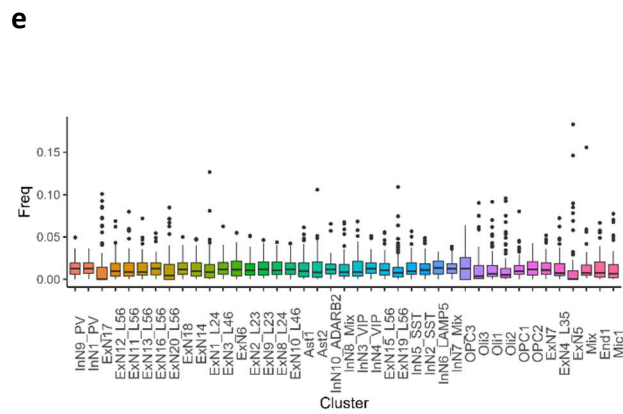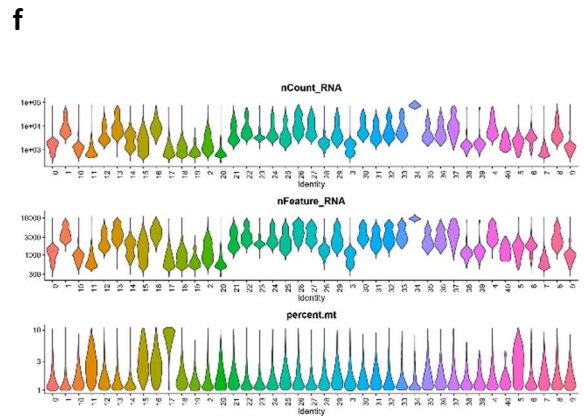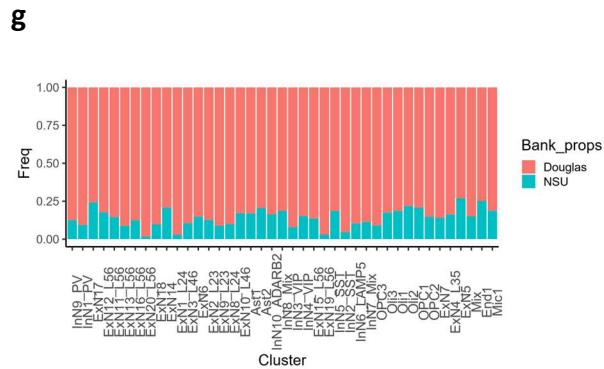

**Supplementary Figure 3: Evaluation of clusters based on technical parameters.** a) Proportions of nuclei from each sex in each cluster. b) Proportion of nuclei from each batch in each cluster. c) Proportion of nuclei from cases and controls among the female nuclei in each cluster. d) Proportion of nuclei from cases and controls among the male nuclei in each cluster. e) Proportion of nuclei from each library (mostly corresponding to subject) in each cluster (for each cluster n=72 samples, i.e. libraries, from 71 biologically independent subjects). The middle line is the median. The lower and upper hinges correspond to the 25<sup>th</sup> and 75<sup>th</sup> percentiles. Upper and lower whiskers extend from the upper or lower hinges to the largest or smallest value no further than 1.5 times the inter-quartile range from the hinge, where the inter-quartile range is the distance between the first and third quartiles. Points beyond the end of the whiskers are plotted individually. f) Violin plots for number of molecules detected, number of genes detected, and percentage of mitochondrial reads per nuclei split by cluster. Mitochondrial gene counts were removed for downstream analysis, after calculating the mitochondrial read percentage. Y-axis is in log-scale. g) Proportions of nuclei from each brain bank in each cluster. For 3a-e, and g, “Freq” stands for frequency representing the proportion of cells. Correspondence between numbered clusters and cluster names in 3f: 0 - ExN1\_L24, 1 - ExN2\_L23, 2 - Ast1, 3 - Oli1, 4 - ExN3\_L46, 5 - ExN4\_L35, 6 - Oli2, 7 - Oli3, 8 - InN1\_PV, 9 - InN2\_SST, 10 - InN3\_VIP, 11 - ExN5, 12 - InN4\_VIP, 13 - ExN6, 14 - OPC1, 15 - End1, 16 - ExN7, 17 - Mix, 18 - Mic1, 19 - OPC2, 20 - Ast2, 21 - InN5\_SST, 22 - ExN8\_L24, 23 - ExN9\_L23, 24 - ExN10\_L46, 25 - InN6\_LAMP5, 26 - ExN11\_L56, 27 - ExN12\_L56, 28 - ExN13\_L56, 29 - InN7\_Mix, 30 - ExN14, 31 - InN8\_ADARB2, 32 - ExN15\_L56, 33 - ExN16\_L56, 34 - ExN17, 35 - InN9\_PV, 36 - InN10\_ADARB2, 37 - ExN18, 38 - ExN19\_L56, 39 - ExN20\_L56, 40 - OPC3. Source data are provided as a Source Data file.

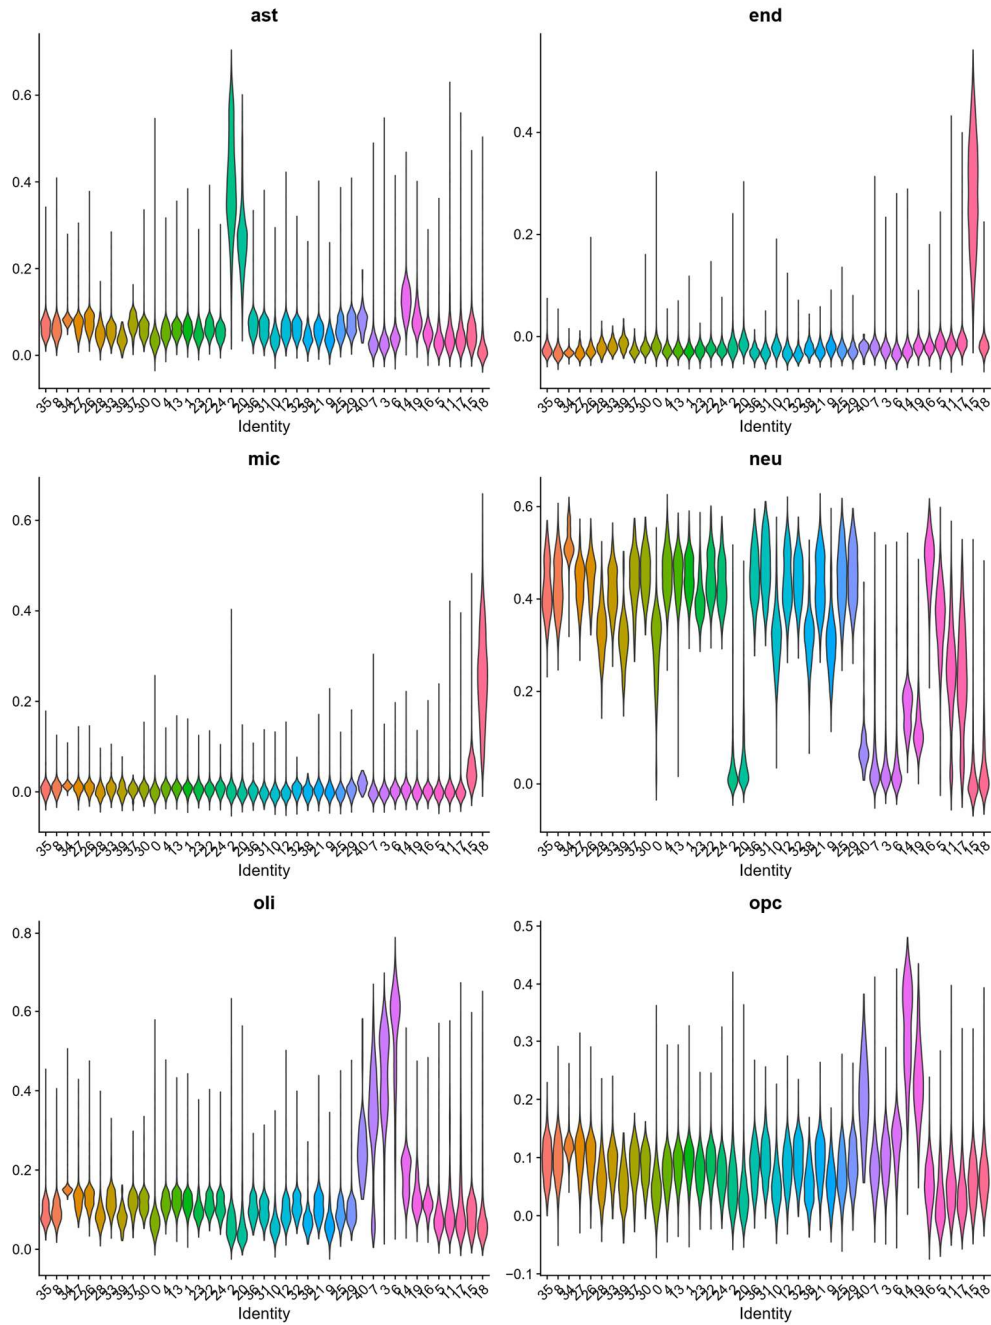

**Supplementary Figure 4: Assessment of cell type scores per cluster.** Violin plots showing module scores for major brain cell type marker genes from BRETIGEA in each cluster. Correspondence between numbered clusters and cluster names same as in Supplementary Figure 3. Source data are provided as a Source Data file.

**a**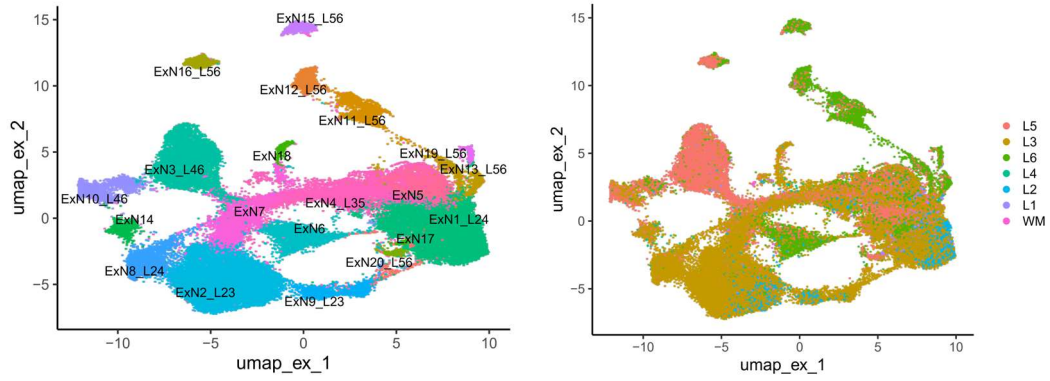**b**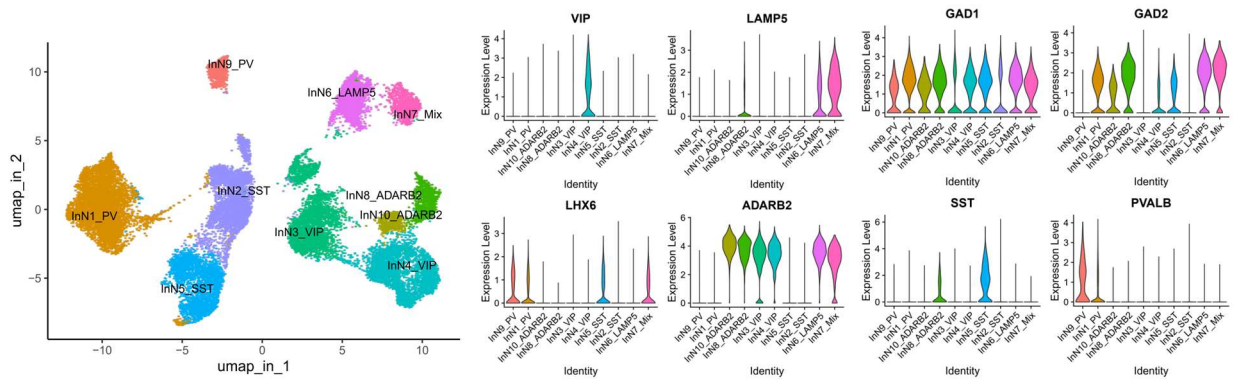**c**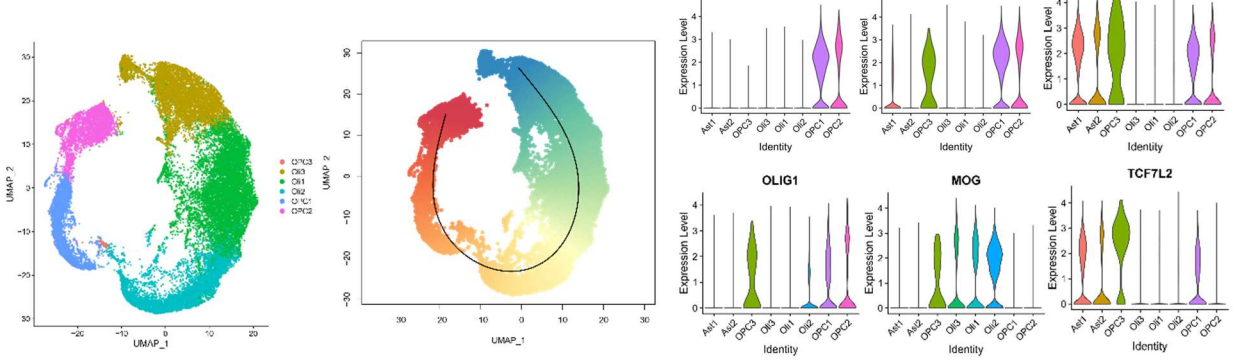**d**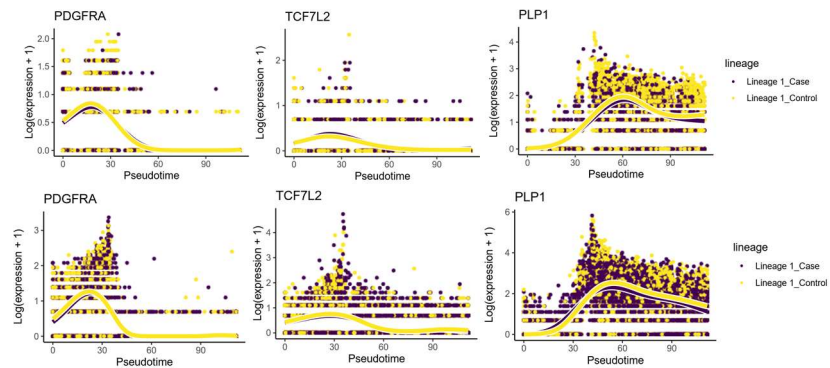



**Supplementary Figure 5: Annotation of cell sub-types among clusters.** a) (left) UMAP plot showing the 20 clusters of excitatory neurons identified. (right) UMAP plot showing the predicted layer labels for excitatory neurons using Seurat label transfer from a spatial transcriptomics dataset of the human dIPFC<sup>1</sup>. b) (left) UMAP plot showing the 10 clusters of inhibitory neurons identified. (right) Violin plots showing the expression of maker genes of inhibitory neurons and their known subtypes. c) (left) UMAP plot showing the 6 oligodendrocyte lineage (OL) clusters. (middle) Same UMAP plot as colored according to the pseudotime trajectory calculated (early to late pseudotime points colored from red to blue). (right) Violin plots showing expression of selected markers of the OL in the respective clusters. d) Smoothed expression fit to depict the variation in expression of selected OL genes along pseudotime using GAMS in males (top) and females (bottom). For UMAPs in (a) and (b) we used the first 50 Harmony components, and `n.neighbors = 20`. Source data are provided as a Source Data file.



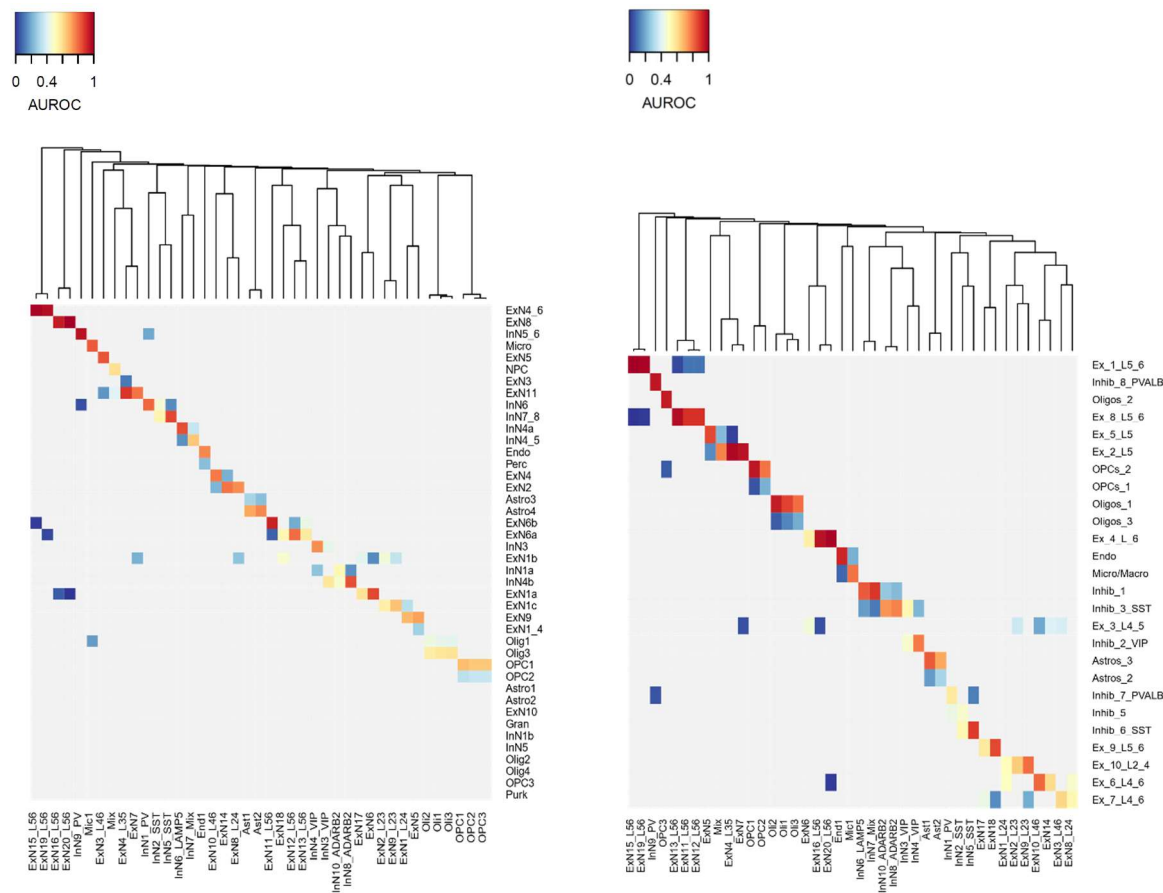

**Supplementary Figure 6: Comparison of clustering to published datasets.** Best hits plot from MetaNeighbor showing the correspondence between clusters defined in our dataset and clusters defined in (left) the STAB dataset and (right) in our previous analysis of the male cohort alone. Clusters defined in this study are represented on the x-axis while clusters defined in the STAB study and the previous analysis of the male data are represented along the y-axis. Source data are provided as a Source Data file.

**a**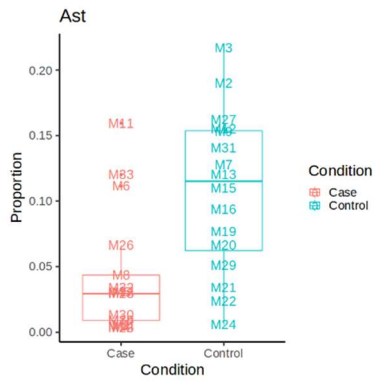**b**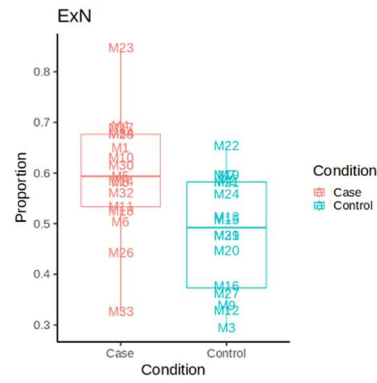**c**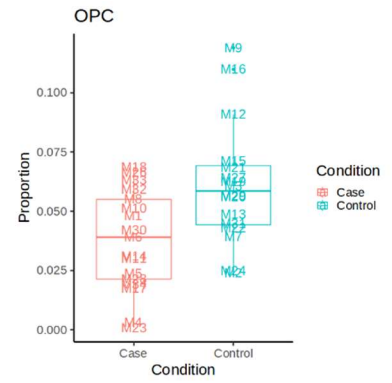**d**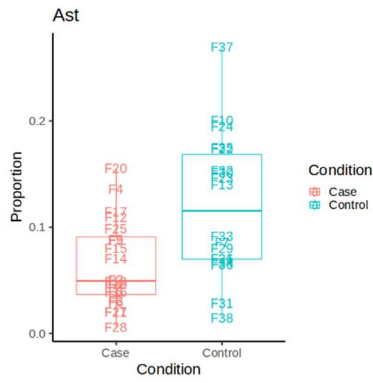**e**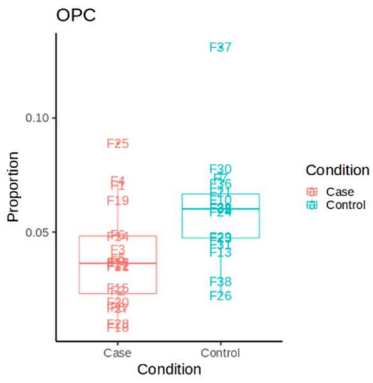**f**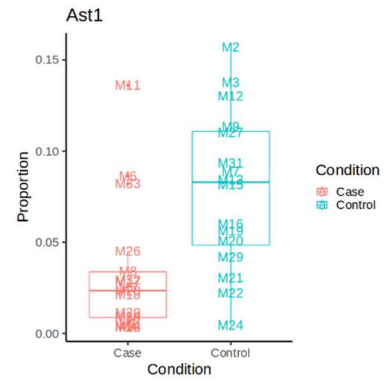**g**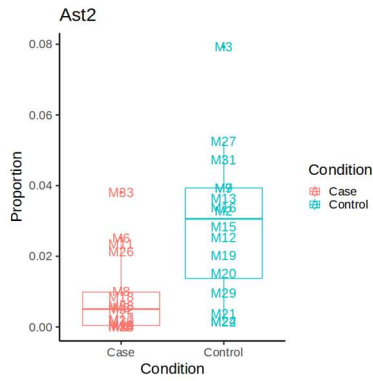**h**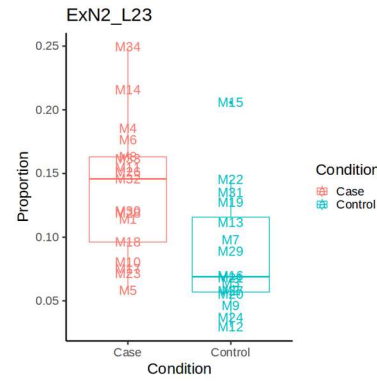

**Supplementary Figure 7: Differences in cell type proportion between cases and controls in each sex.** Boxplots showing cell type proportions with significant differences between MDD cases and controls, using Wilcoxon tests performed on the male and female datasets separately (n= 17 cases, 16 controls, for males and n=20 cases, 18 controls for females, representing biologically independent samples for each cluster). At the broad level, there was a significant decrease in males in a) Ast (FDR 0.0130) and b) OPC (FDR 0.0325) and an increase in c) ExN (FDR 0.0325). In females, at the broad level the decrease in d) Ast was close to significance (FDR 0.0536) and the decrease in e) OPC (0.0466) was significant. At the cluster level there were no significant differences in the female dataset, but there was a decrease in f) Ast1 (FDR 0.0364) and g) Ast2 (FDR 0.0364) in males and an increase in h) ExN2\_L23 (FDR 0.0492). Two-tailed Wilcoxon tests were performed. The middle line is the median. The lower and upper hinges correspond to the 25<sup>th</sup> and 75<sup>th</sup> percentiles. Upper and lower whiskers extend from the upper or lower hinges to the largest or smallest value no further than 1.5 times the inter-quartile range from the hinge, where the inter-quartile range is the distance between the first and third quartiles. Points beyond the end of the whiskers are plotted individually. Source data are provided as a Source Data file.

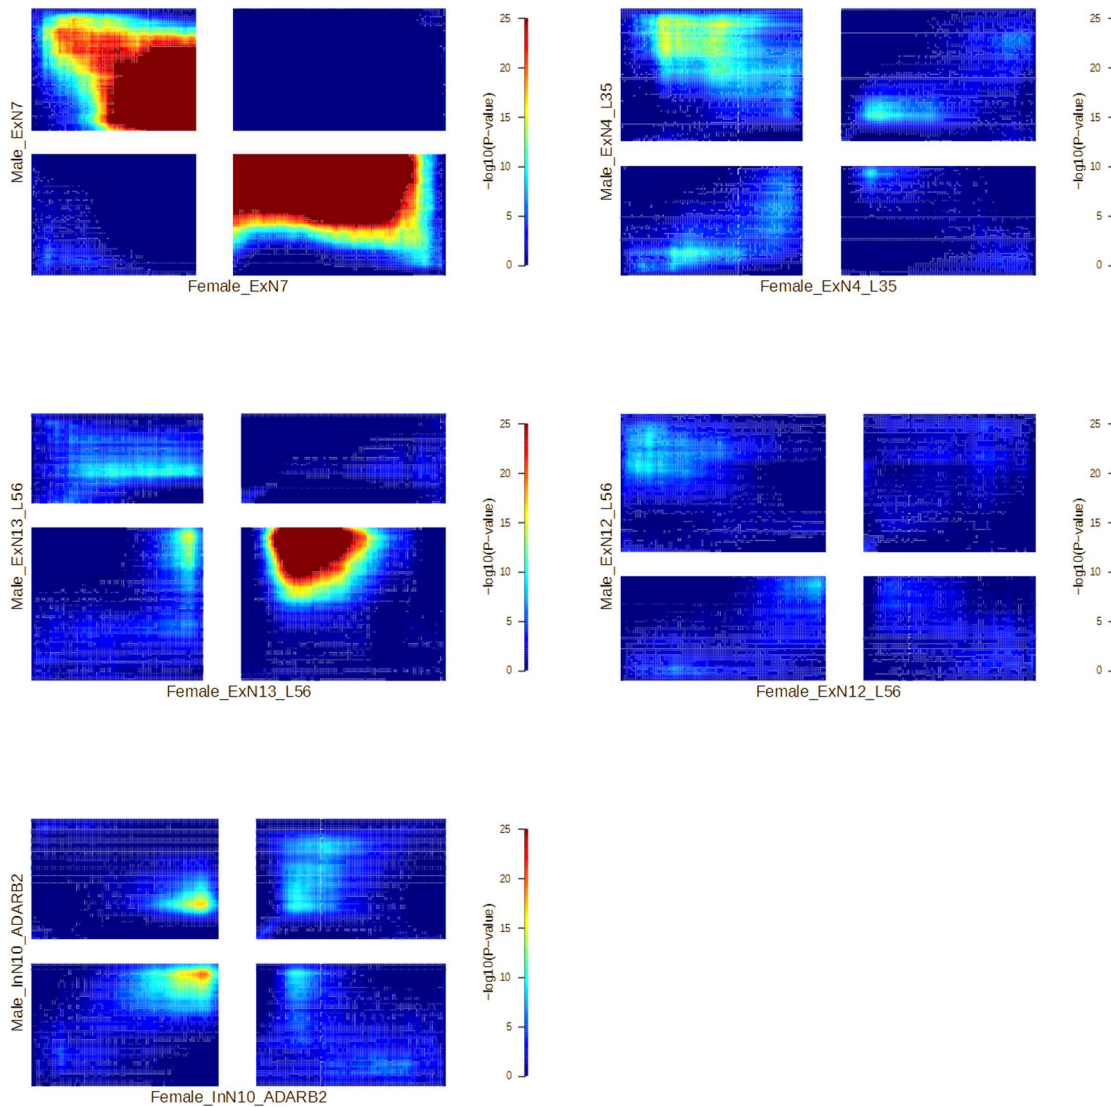

**Supplementary Figure 8: RRHO plots for discordant clusters.** RRHO plots showing the discordant relationship between males and females for patterns in depression-associated gene expression difference in several excitatory and inhibitory neuronal clusters. Interpretation of the plots is similar to Figure 2. For RRHO plots comparing broad cell types the color scale maximum was set to a  $-\log_{10}(\text{p-value})$  of 50, and for RRHO plots comparing clusters the color scale maximum was set to a  $-\log_{10}(\text{p-value})$  of 25 for ease of comparison. RRHO2 uses one-sided hypergeometric tests, the p-values plotted here are uncorrected. Source data are provided as a Source Data file.

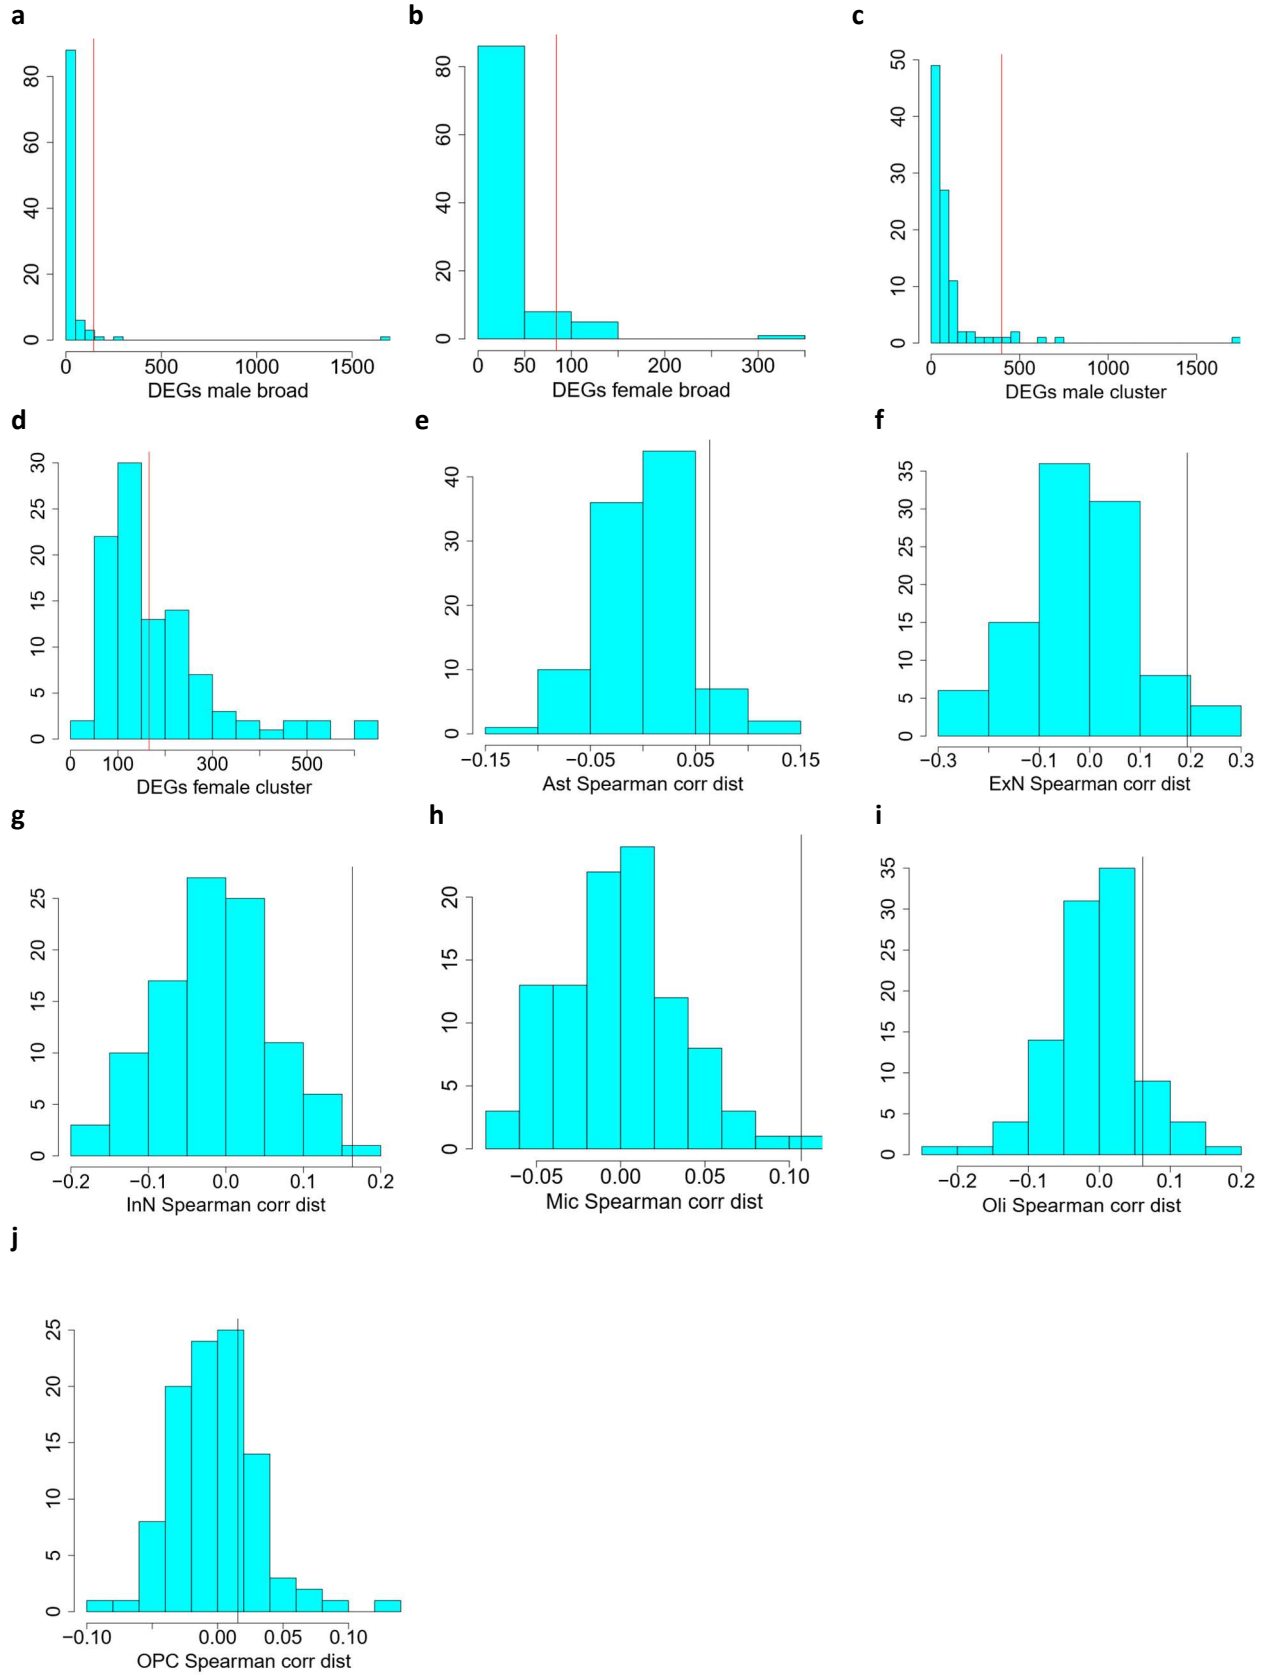

**Supplementary Figure 9: Permutation assessment for differential expression.** Distribution of numbers of unique DEGs using permuted case versus controls labels in: a) males at the broad level, b) females at the broad level, c) males at the cluster level, and d) females at the cluster level. Red vertical lines indicate the number of unique DEGs obtained with real labels and show that the real labels result in higher number of unique DEGs than expected by chance with random case versus control annotations for both sexes at the broad level, and for males at the cluster level. e-j) Distribution of Spearman correlation coefficients when correlating gene scores based on male and female dataset differential gene expression analyses with permuted labels, for broad cell types. The black vertical line denotes the Spearman correlation coefficient obtained with the real case control labels and is higher than the majority of coefficients obtained with randomly permuted cases versus control labels for Ast, ExN, InN, and Mic and to a lesser extent for Oli and OPC. In all plots, the y-axis represents the number of iterations of permutations. Source data are provided as a Source Data file.

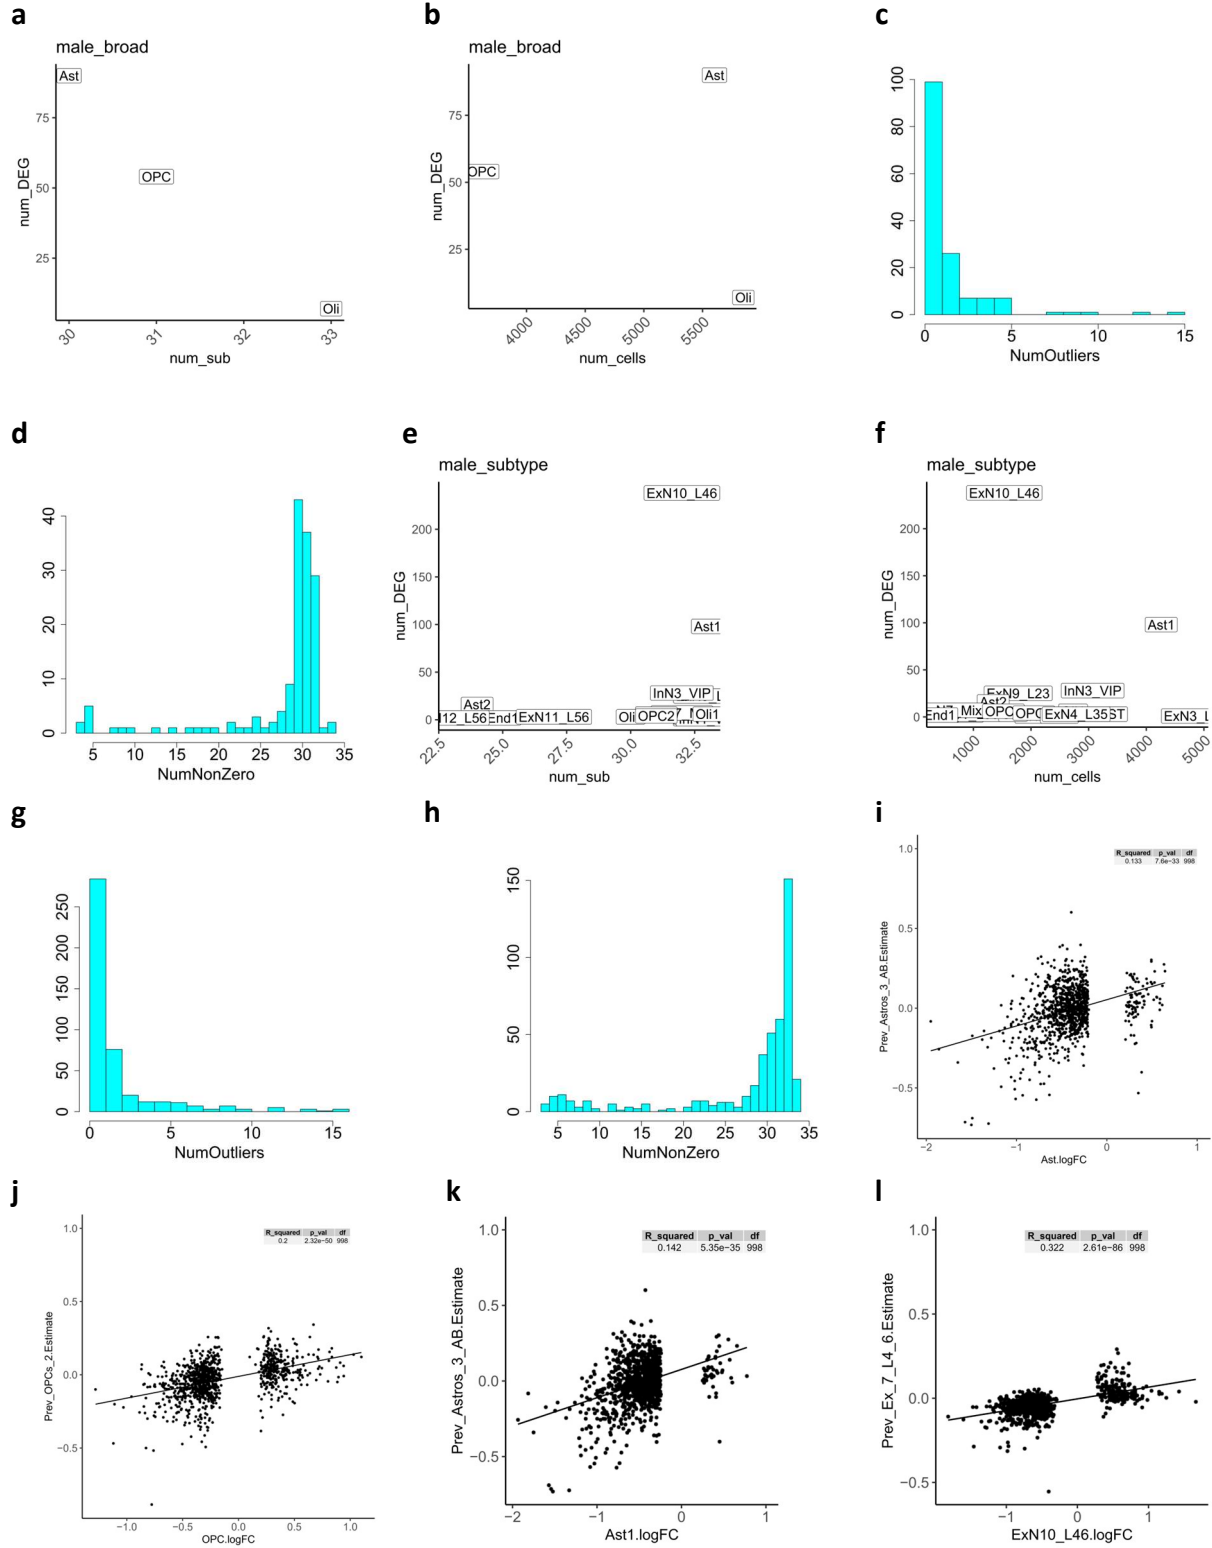



**Supplementary Figure 10: Evaluation of male differential expression results.** Number of DEGs in each broad cell type for males plotted against (a) the number of subjects included in DEG analysis and (b) the total number of nuclei in the broad cell type. For DEGs in males at the broad cell type level (c) the distribution of number of subjects flagged as possible outliers and (d) the distribution of subjects with non-zero expression. Number of DEGs in each cluster for males plotted against (e) the number of subjects included in DEG analysis and (f) the total number of nuclei in the cluster. For DEGs in males at the cluster level (g) the distribution of number of subjects flagged as possible outliers and (h) the distribution of subjects with non-zero expression. Possible outliers were not removed from the analyses but were assessed as a quality metric for DEG analysis. The plots include the Mix cluster results. i-l) Scatter plots showing the relationship between (linear regression and corresponding statistics) the estimated effects per gene from our previous analysis of the male data and the log fold changes from our current analysis for cell type specific case-control differences in males for similar pairs of clusters. Source data are provided as a Source Data file.

a

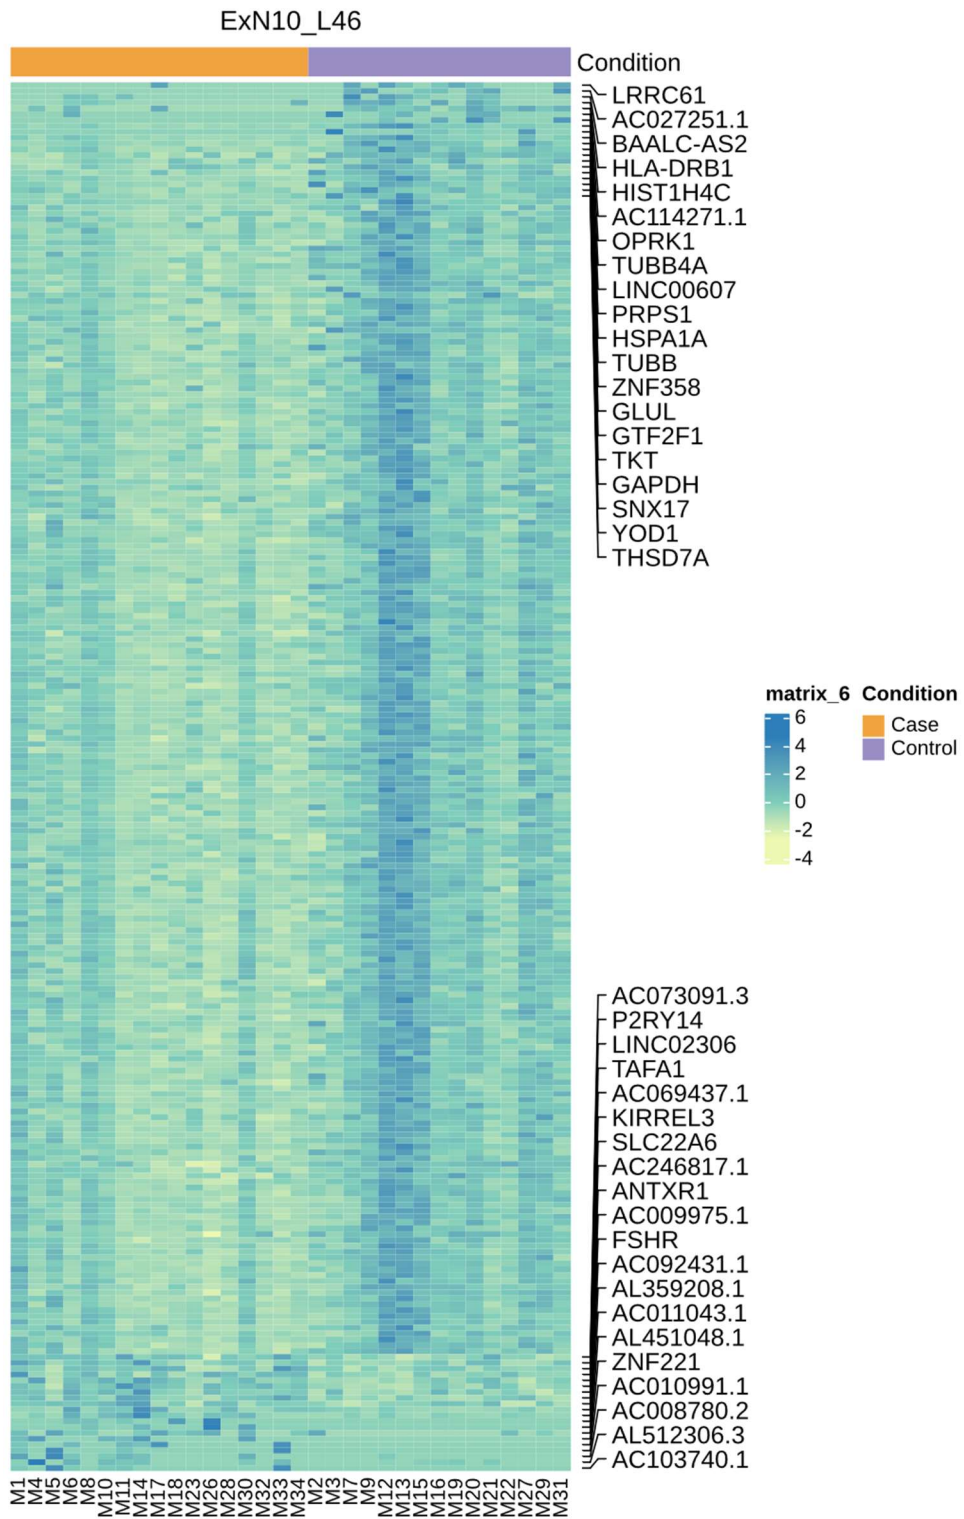

b

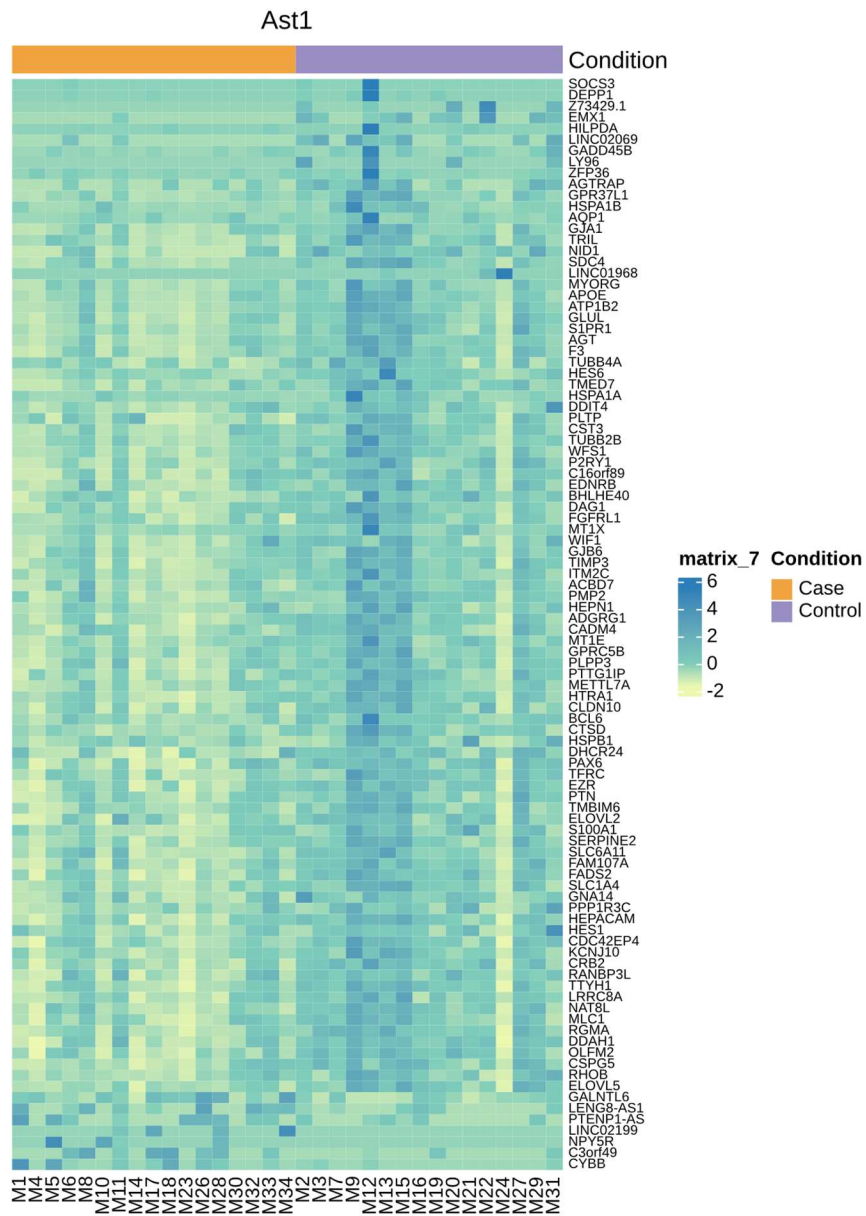

**Supplementary Figure 11: DEGs in top clusters for males.** a) Heatmaps showing the pseudobulk expression of differentially expressed genes in top clusters with highest number of DEGs in the male cluster level analysis – (a) ExN10\_L46, (b) *Ast1*. The plotted values are pseudobulk CPMs calculated with edgeR and muscat and scaled per row (by gene). The annotation bar at the top is colored orange for cases and purple for controls, and rows and columns are not clustered. For

ExN10\_L46 the DEGs are in ascending order of log fold change from top to bottom. Source data are provided as a Source Data file.

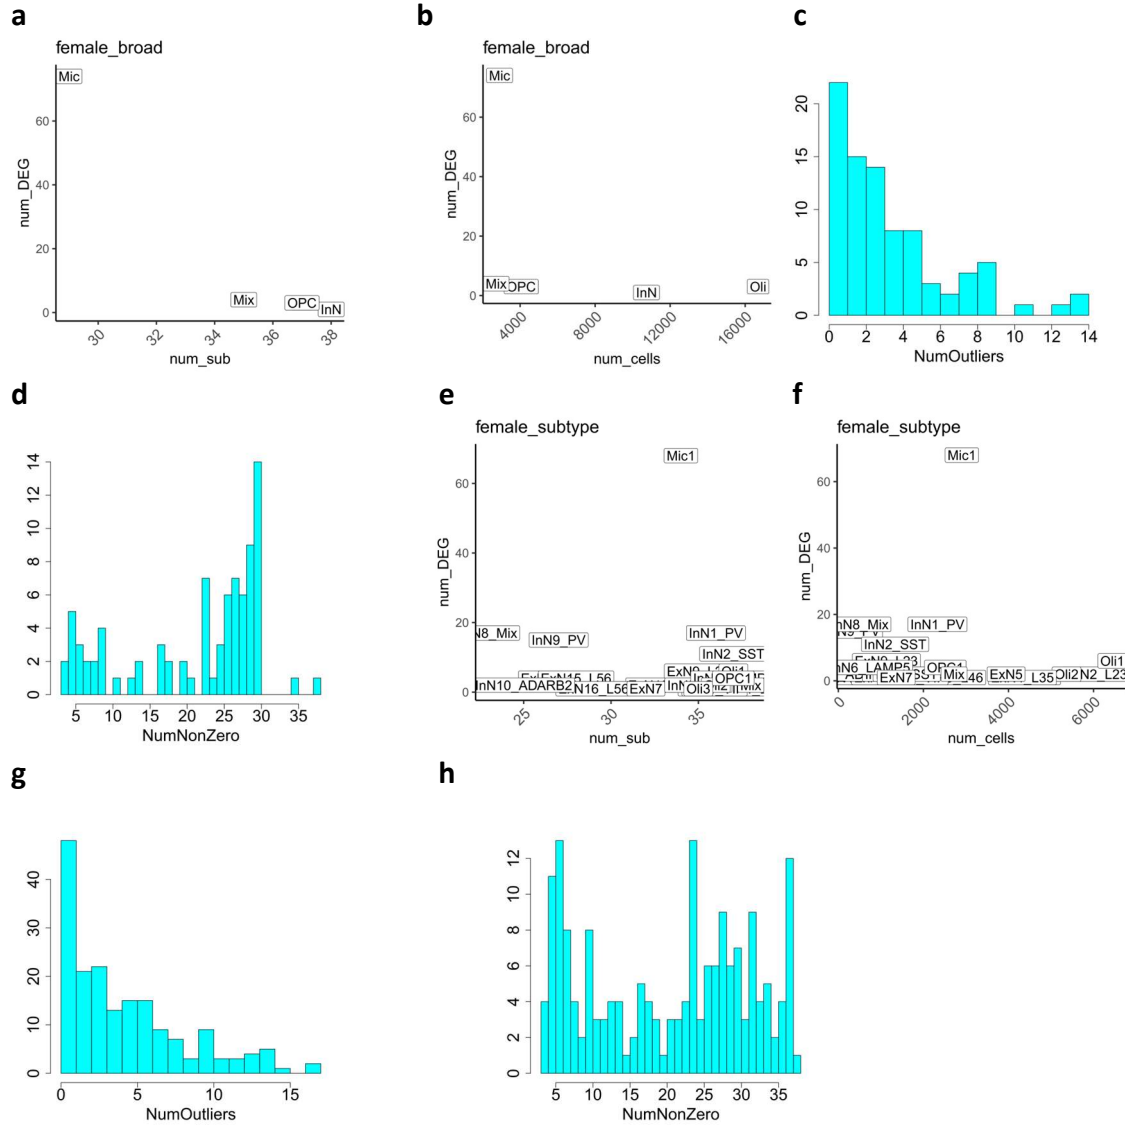

i

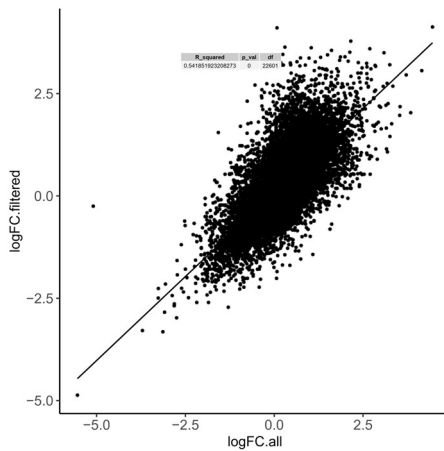

**Supplementary Figure 12: Evaluation of female differential expression results.** Number of DEGs in each broad cell type for females plotted against (a) the number of subjects included in DEG analysis and (b) the total number of nuclei in the broad cell type. For DEGs in females at the broad cell type level (c) the distribution of number of subjects flagged as possible outliers and (d) the distribution of subjects with non-zero expression. Number of DEGs in each cluster for females plotted against (e) the number of subjects included in DEG analysis and (f) the total number of nuclei in the cluster. For DEGs in females at the cluster level (g) the distribution of number of subjects flagged as possible outliers and (h) the distribution of subjects with non-zero expression. Possible outliers were not removed from the analyses but were assessed as a quality metric for DEG analysis. The plots include the Mix cluster results. i) Scatter plot of log fold changes per gene in DEG analysis of the female microglia data at the cluster level with or without including nuclei that express oligodendroglial markers and cluster close to oligodendroglia on the UMAP plot (methods: Differential expression analysis - Sub-clustering of microglia for differential expression analysis in females). The majority of DEGs obtained with the full microglia cluster were retained in the subsetted microglia cluster (40/68, 59%) and the log fold changes for DEGs were strongly

positively related (linear regression) with an R-squared of 0.54. Source data are provided as a Source Data file.

**a**

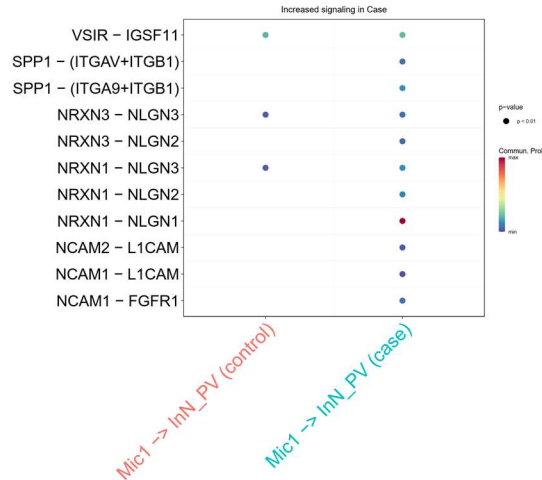

**b**

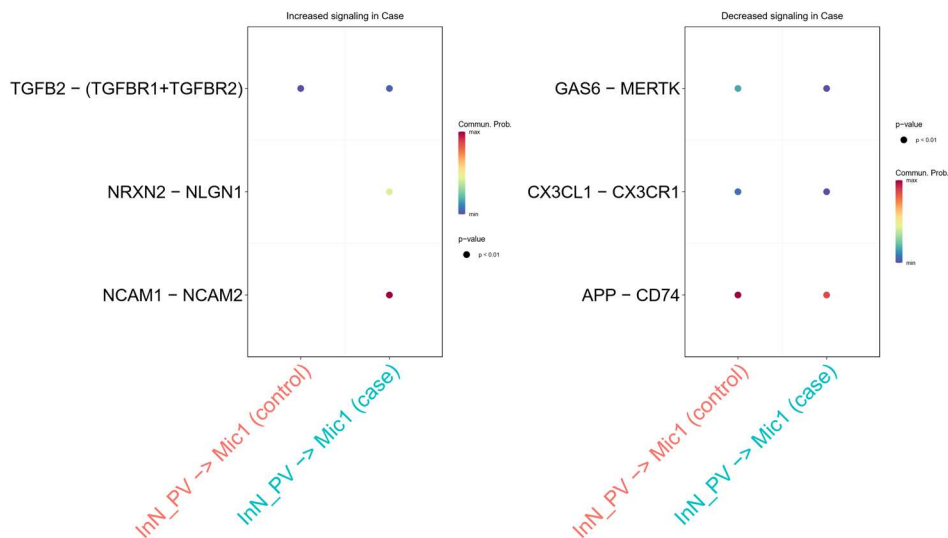

**Supplementary Figure 13: Exploratory visualization of ligand-receptor interaction comparison**

**in female microglia and PV interneurons.** a) Ligand-receptor pairs with increased signaling from microglia to PV interneurons in cases compared to controls. b) Ligand receptor pairs with increased (left) and decreased (right) signaling from PV interneurons to microglia in cases compared to controls. These results are based on a preliminary assessment using CellChat. The

p-values, corresponding to communication between individual ligand-receptor pairs in cases and controls separately, are based on permutation and are uncorrected. Source data are provided as a Source Data file.

**Supplementary References:**

1. Maynard, K.R., *et al.* Transcriptome-scale spatial gene expression in the human dorsolateral prefrontal cortex. *Nature neuroscience* 24, 425-436 (2021).
